# Supplementary material for: Surfactant-free synthesis of SrTiO3 hierarchical structures in ethanol/water mixed solvent at room temperature
Source: Royal Society of Chemistry journal article supplement (doi:10.1039/c4ce02228a), 2014-12-09
Supplement: c4ce02228a1.pdf [file c4ce02228a1.pdf]

## Supplementary Information

# Surfactant-Free Synthesis of SrTiO<sub>3</sub> Hierarchical Structures in an Ethanol/Water Mixed Solvent at Room Temperature

Qing-Song Wu, Jian-Wei Liu, Shao-Feng Chen, Hai-Wei Liang and Shu-Hong Yu\*

Received (in XXX, XXX) Xth XXXXXXXXXX 20XX, Accepted Xth XXXXXXXXXX 20XX

DOI: 10.1039/b000000x

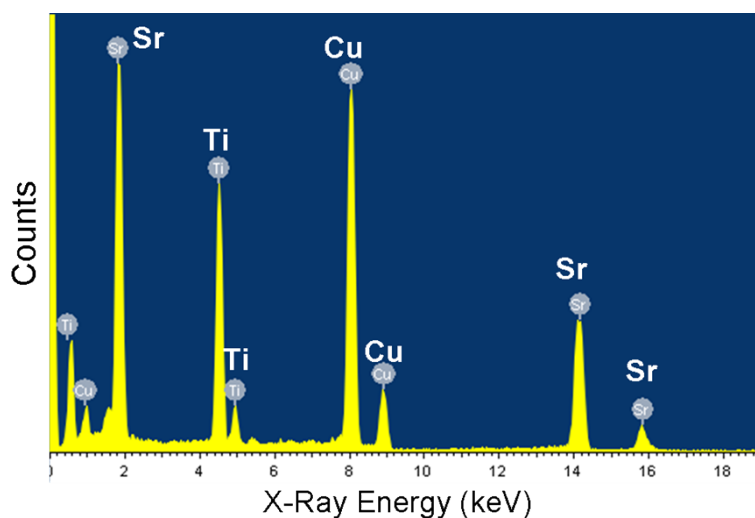

Fig. S1 EDS spectrum of the SrTiO<sub>3</sub> sample. The signals corresponding to Cu arise from the TEM grid.

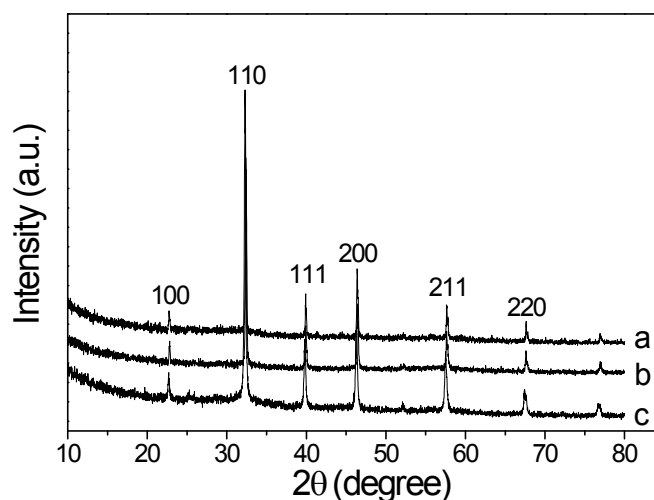

Fig. S2 XRD patterns of the samples prepared with different volume ratio of water/ethanol in 0.45 mol·dm<sup>-3</sup> KOH: (a) pure water, (b) water: ethanol = 3:1, and (c) water: ethanol = 1:3.

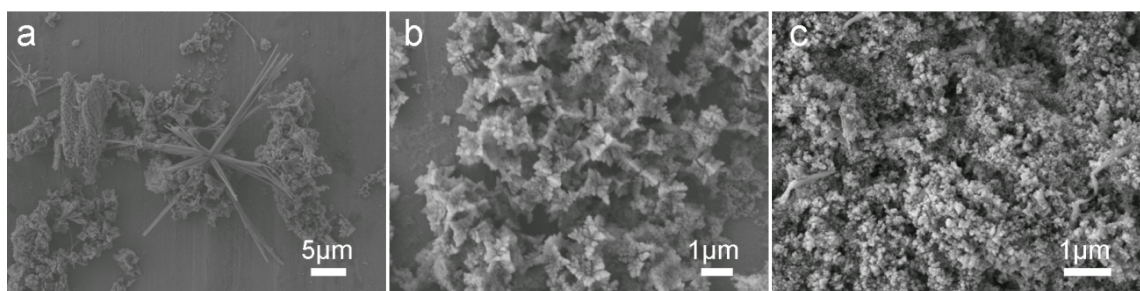

**Fig. S3** SEM images of the SrTiO<sub>3</sub> samples prepared in a solution with different volume ratio of water/ethanol and 0.45 mol·dm<sup>-3</sup> KOH: (a) pure water, (b) water: ethanol = 3:1, and (c) water: ethanol = 1:3.

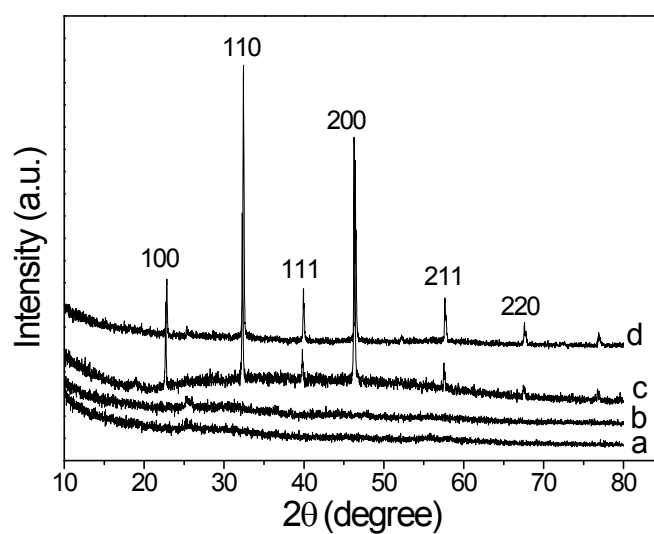

**Fig. S4** XRD patterns of the samples prepared by using 0.9 mol·dm<sup>-3</sup> KOH with different reaction time: (a) 5 min, (b) 1 h, (c) 24 h, and (d) 96 h.

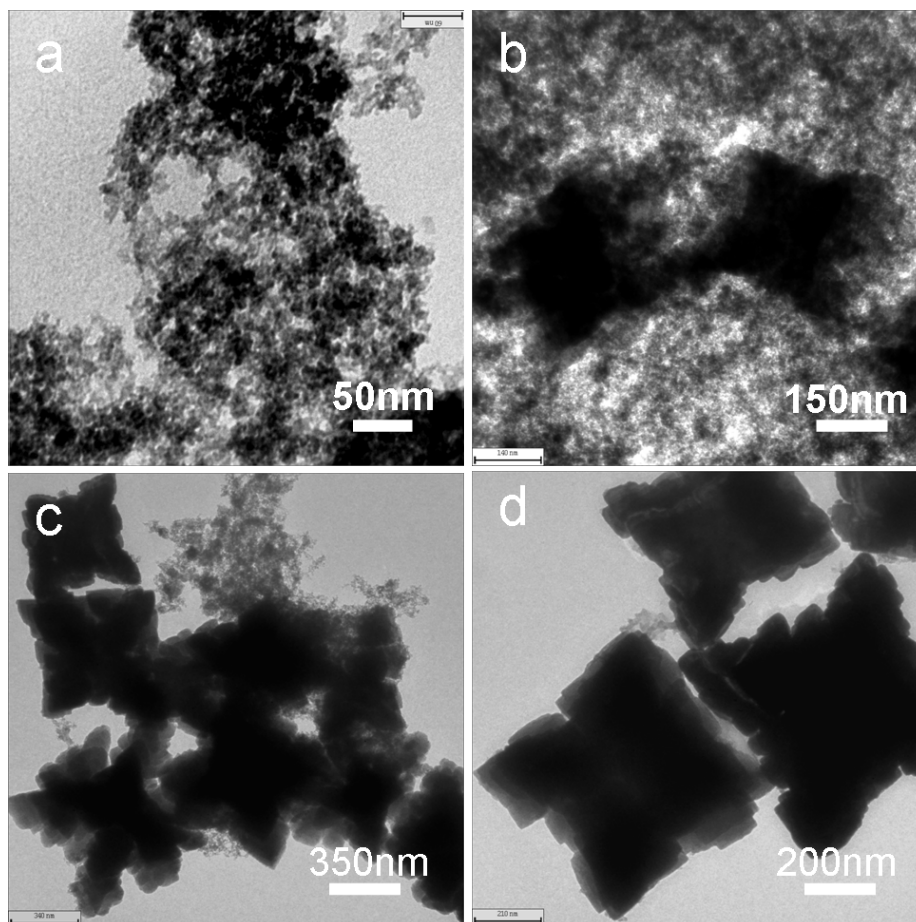

**Fig S5** TEM images of the samples prepared by using  $0.9 \text{ mol}\cdot\text{dm}^{-3}$  KOH with different reaction time: (a) 5 min, (b) 5 h, (c) 24 h, and (d) 96 h.

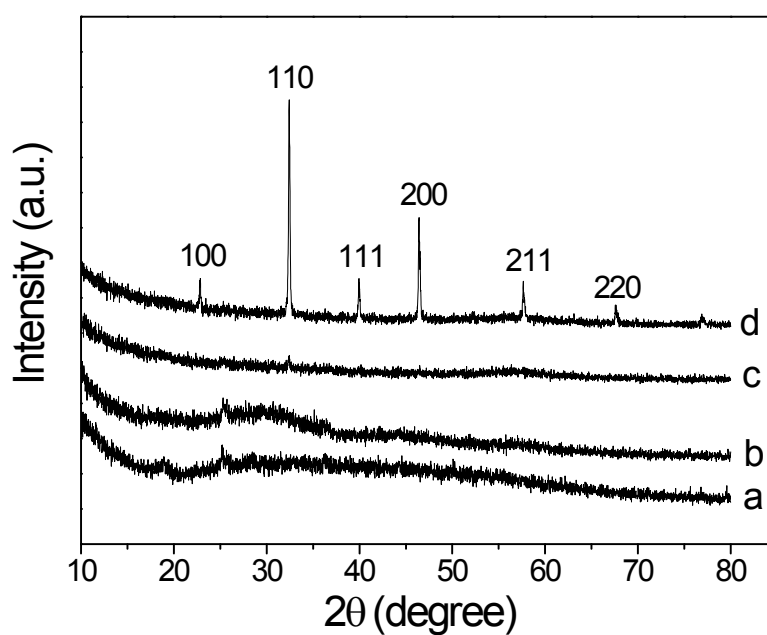

**Fig. S6** XRD patterns of the samples obtained by using  $0.45 \text{ mol}\cdot\text{dm}^{-3}$  KOH with different reaction time: (a) 5 min, (b) 1 h, (c) 24 h, and (d) 96 h.

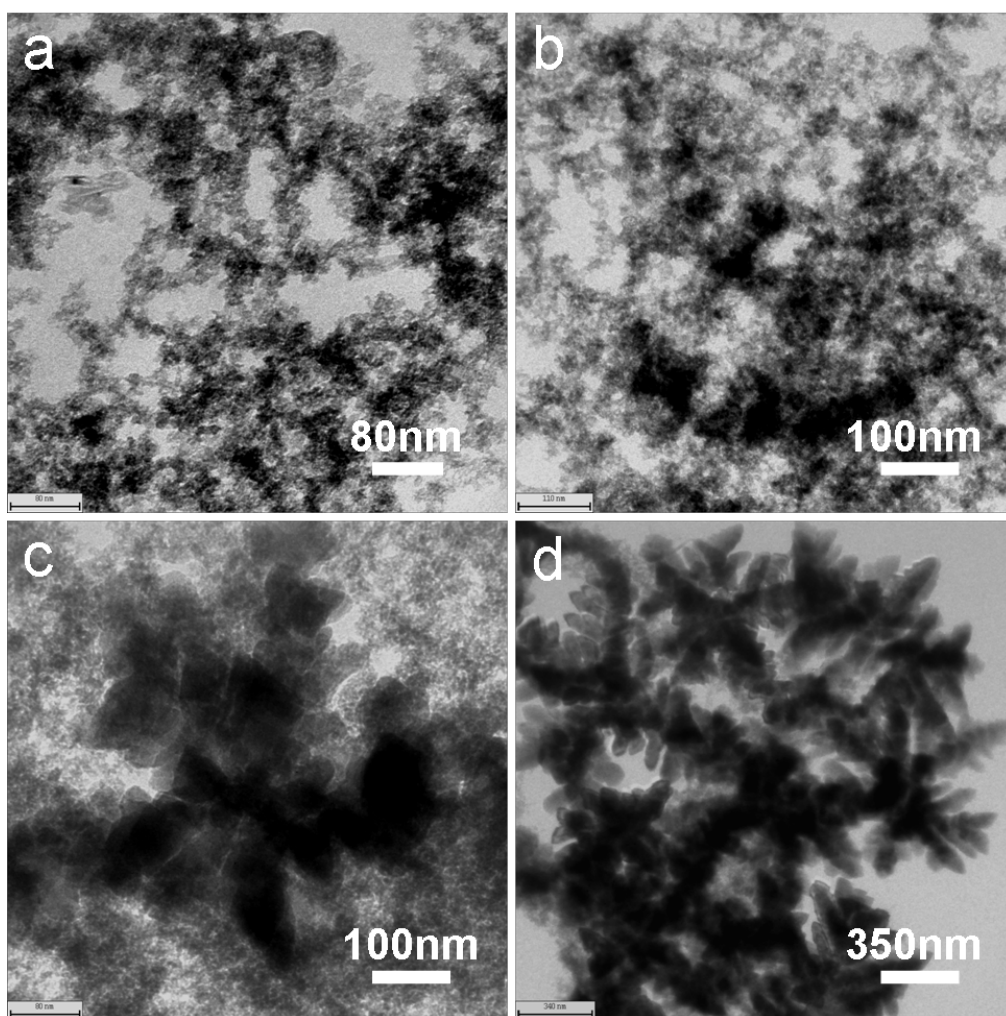

**Fig. S7** TEM images of the samples obtained by using  $0.45 \text{ mol}\cdot\text{dm}^{-3}$  KOH with different reaction time: (a) 5 min, (b) 5 h, (c) 24 h, and (d) 96 h.

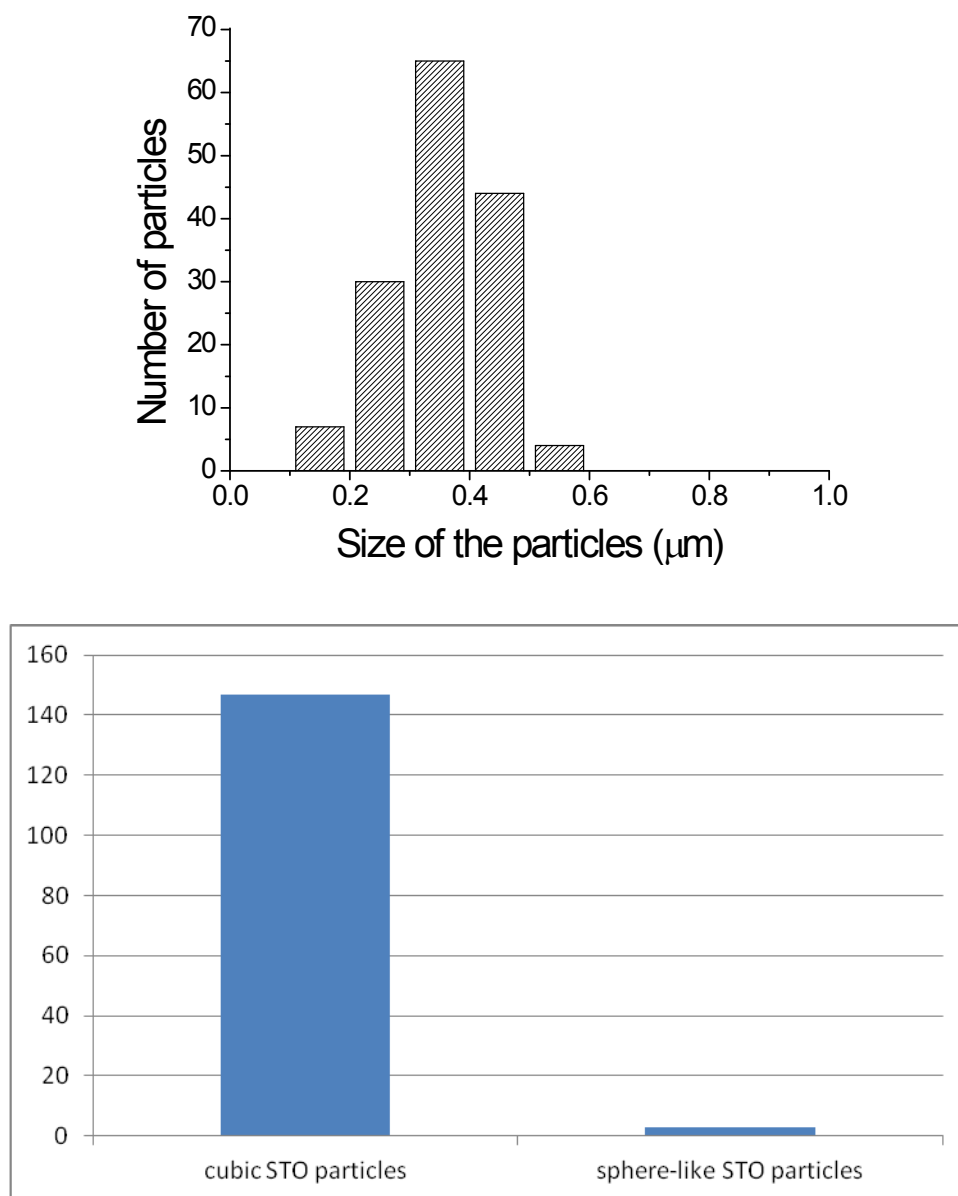

**Fig. S8** Size and morphology distribution of the samples prepared by using  $2.7 \text{ mol} \cdot \text{dm}^{-3}$  KOH.

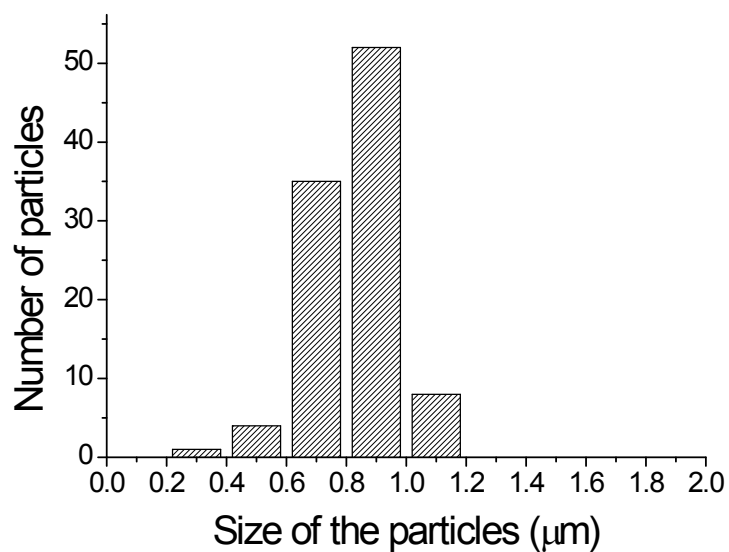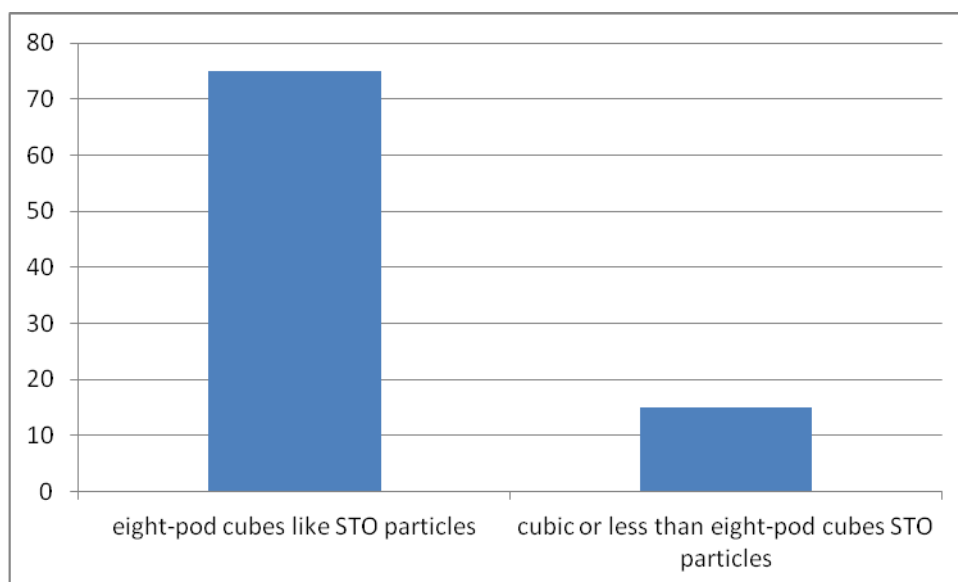

**Fig. S9** Size and morphology distribution of the samples prepared by using  $0.9 \text{ mol} \cdot \text{dm}^{-3}$  KOH.

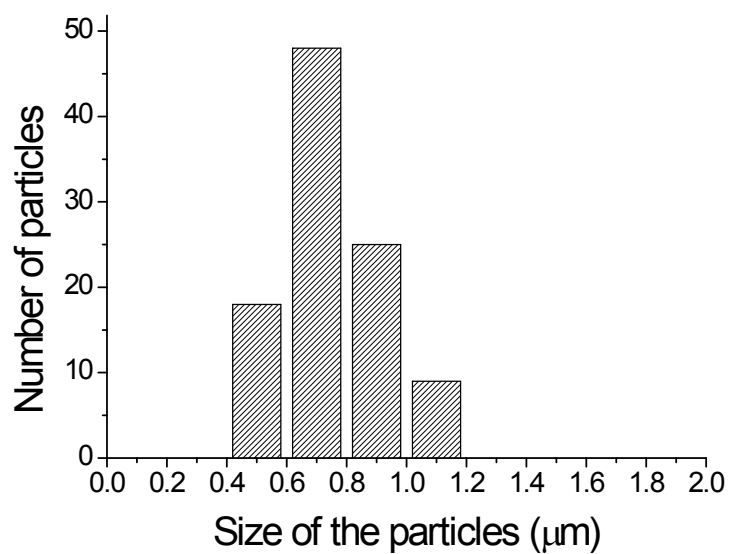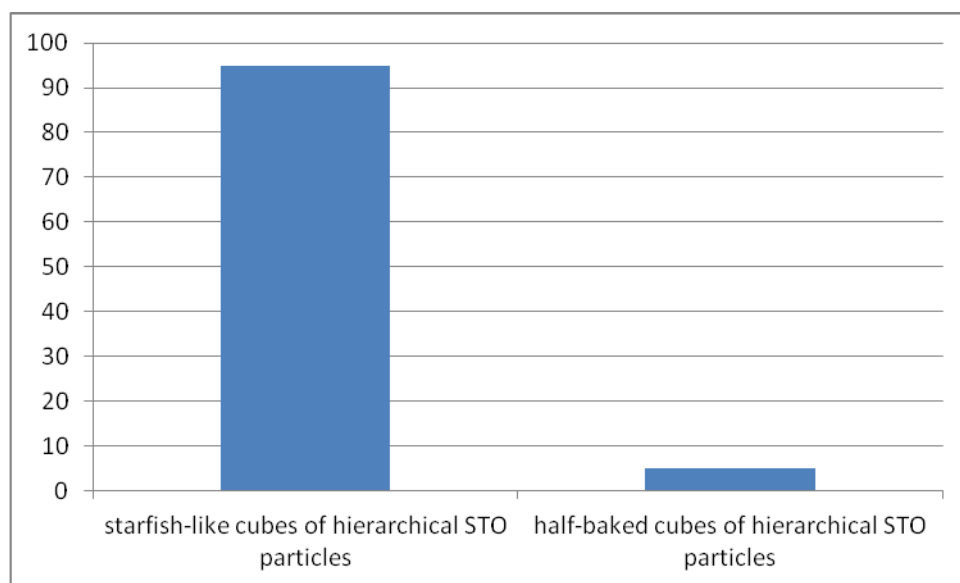

**Fig. S10** Size and morphology distribution of the samples prepared by using  $0.45 \text{ mol}\cdot\text{dm}^{-3}$  KOH.
